# Supplementary material for: Anion binding by catechols—an NMR, optical and electrochemical study
Source: Royal Society of Chemistry journal article supplement (doi:10.1039/b516433h), 2006-01-01

## Supplementary Information

Negative ion electrospray mass spectrum taken from mixture of catechol (**1**) (2 mM) and tetrabutylammonium fluoride (20 mM) in acetonitrile solution.

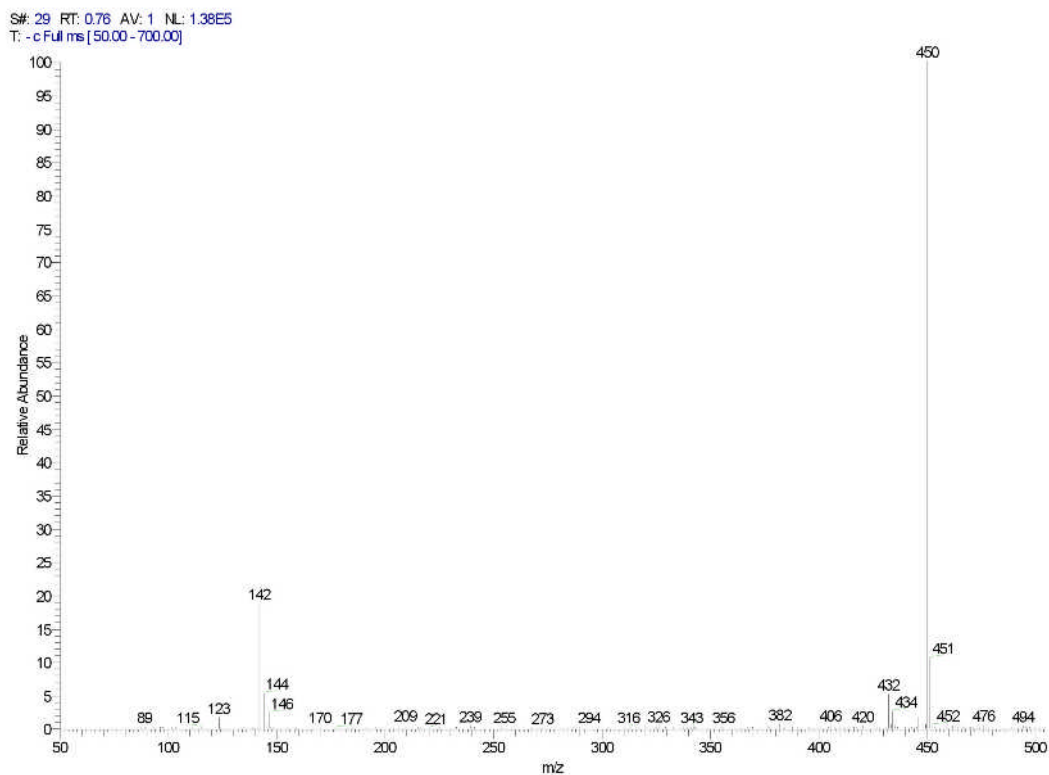

Supplement: b516433h.pdf [file b516433h.pdf]
